# Supplementary material
Source: PubMed Central journal article supplement (PMC5537483)
Supplement: mmc1.pdf [file mmc1.pdf]

## Delphi Exercise Round 3: Neurological and neuromuscular Experts

The following answers of the participants have been assigned to the ICF categories.

Do you agree that this ICF category represents pediatric patients' problems to be treated with aquatic therapy?

| Code and Name ICF Category                           | Your answers. Find a number, if you named the corresponding ICF category in Round 1, with the n° of times you did it. | This % of participants named these ICF categories as relevant to be treated with Aquatic Therapy in pediatric patients in the second round of Delphi. | YES/NO |
|------------------------------------------------------|-----------------------------------------------------------------------------------------------------------------------|-------------------------------------------------------------------------------------------------------------------------------------------------------|--------|
| <b>b1 CHAPTER 1 MENTAL FUNCTIONS</b>                 |                                                                                                                       |                                                                                                                                                       |        |
| b110 Consciousness functions                         |                                                                                                                       | 65,63                                                                                                                                                 |        |
| b114 Orientation functions                           | 1                                                                                                                     | 81,25                                                                                                                                                 |        |
| b1140 Orientation to time                            |                                                                                                                       | 65,63                                                                                                                                                 |        |
| b1141 Orientation to place                           |                                                                                                                       | 68,75                                                                                                                                                 |        |
| b117 Intellectual functions                          |                                                                                                                       | 71,88                                                                                                                                                 |        |
| b122 Global psychosocial functions                   |                                                                                                                       | 68,75                                                                                                                                                 |        |
| b126 Temperament and personality functions           |                                                                                                                       | 34,38                                                                                                                                                 |        |
| b130 Energy and drive functions                      | 1                                                                                                                     | 87,50                                                                                                                                                 |        |
| b1303 Craving                                        |                                                                                                                       | 71,88                                                                                                                                                 |        |
| b140 Attention functions                             | 1                                                                                                                     | 90,63                                                                                                                                                 |        |
| b1400 Sustaining attention                           |                                                                                                                       | 87,50                                                                                                                                                 |        |
| b144 Memory functions                                |                                                                                                                       | 71,88                                                                                                                                                 |        |
| b147 Psychomotor functions                           | 2                                                                                                                     | 90,63                                                                                                                                                 |        |
| b1470 Control psicomotor                             |                                                                                                                       | 81,25                                                                                                                                                 |        |
| b152 Emotional functions                             |                                                                                                                       | 84,38                                                                                                                                                 |        |
| b156 Perceptual functions                            | 1                                                                                                                     | 84,38                                                                                                                                                 |        |
| b1560 Auditory perception                            |                                                                                                                       | 43,75                                                                                                                                                 |        |
| b160 Thought functions                               |                                                                                                                       | 59,38                                                                                                                                                 |        |
| b163 Basic cognitive functions                       | 1                                                                                                                     | 81,25                                                                                                                                                 |        |
| b164 Higher-level cognitive functions                |                                                                                                                       | 62,50                                                                                                                                                 |        |
| b167 Mental functions of language                    |                                                                                                                       | 43,75                                                                                                                                                 |        |
| b176 Mental function of sequencing complex movements |                                                                                                                       | 78,13                                                                                                                                                 |        |
| b180 Experience of self and time functions           |                                                                                                                       | 75,00                                                                                                                                                 |        |
| b1801 Body image                                     |                                                                                                                       | 71,88                                                                                                                                                 |        |
